# Supplementary material
Source: PubMed Central journal article supplement (PMC8484514)
Supplement: NIHMS1715604-supplement-Supp__F1_5_T2_5.pdf [file NIHMS1715604-supplement-Supp__F1_5_T2_5.pdf]

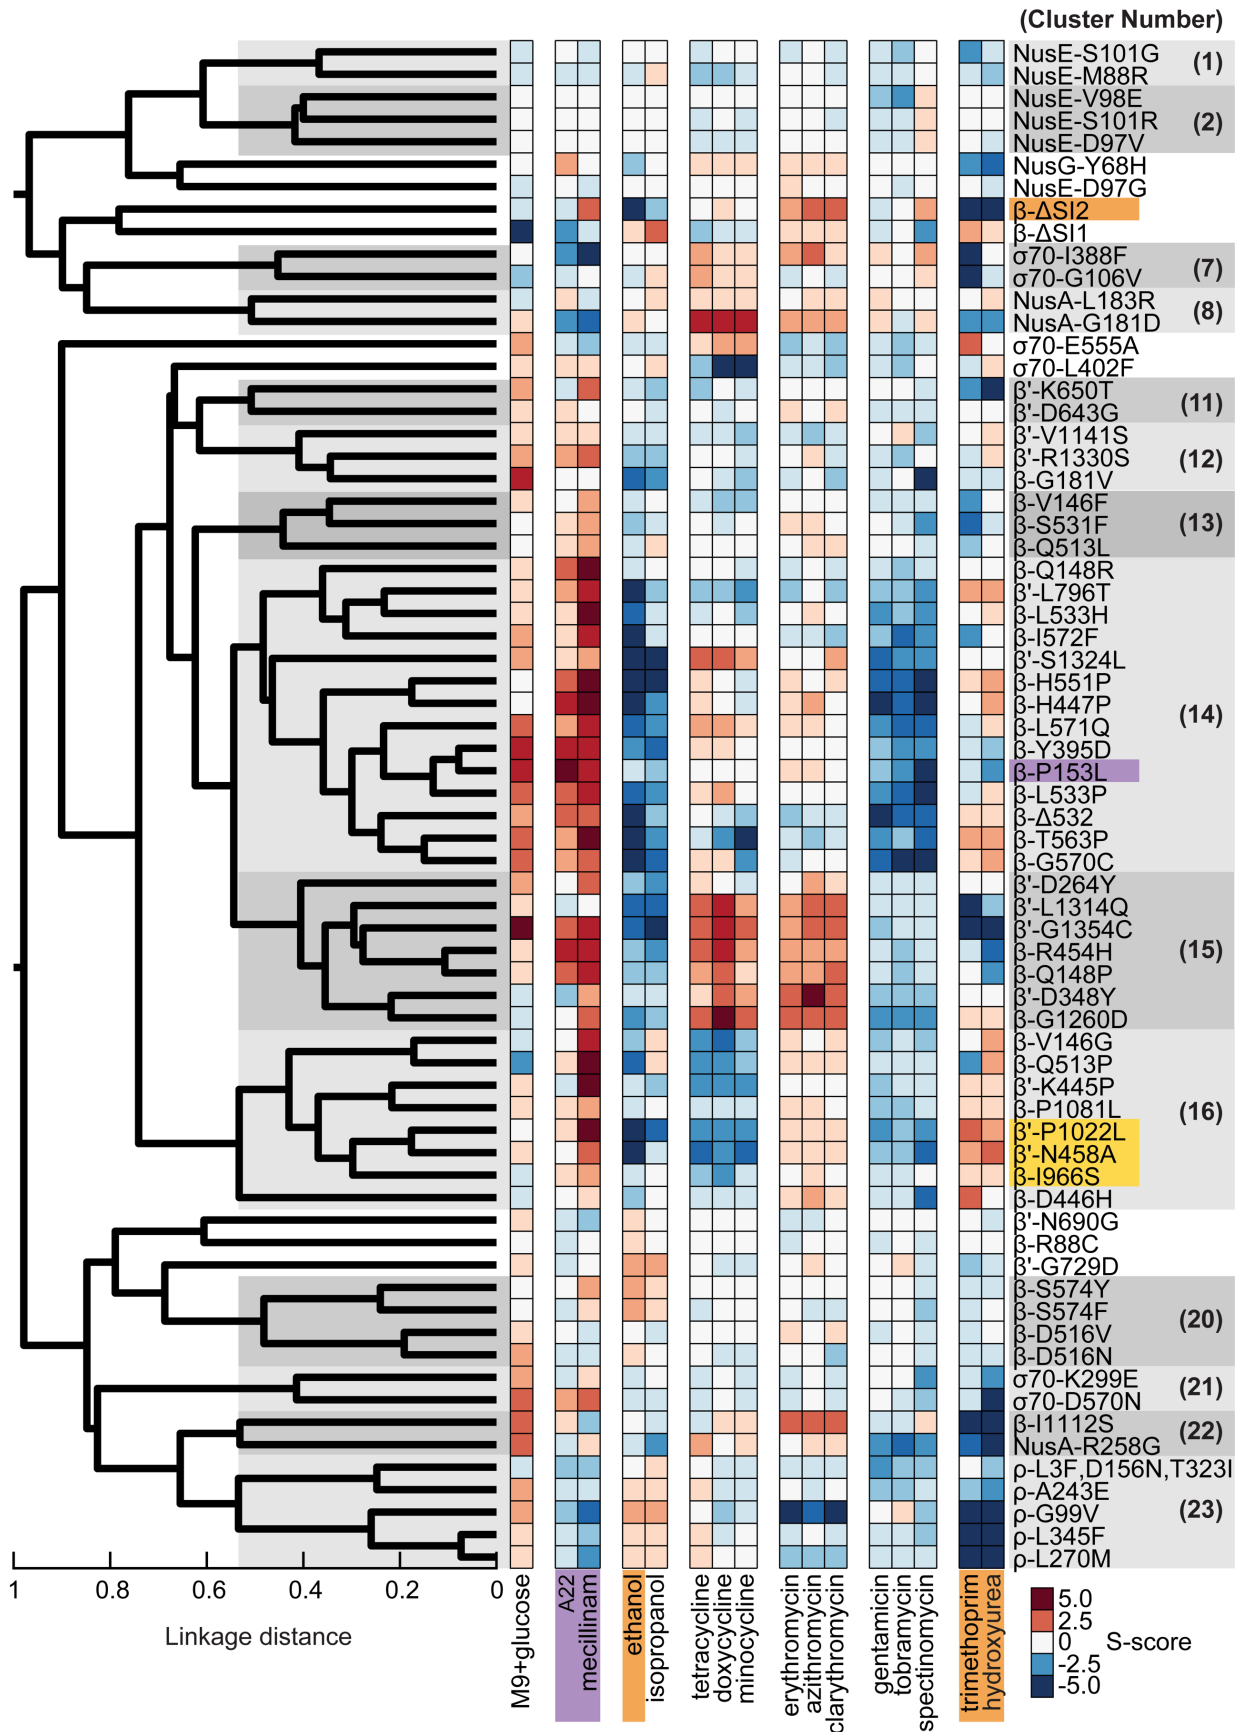

**Supplemental Figure 1: Dendrogram of significant hierarchical clusters and a heatmap of relevant chemical-genetic interactions, Related to Figures 2,3,4,5.**

Transcription mutants were hierarchically clustered according to shared sensitivities in the chemical-genetic dataset. A cutoff for linkage distance (Methods) identified 14 clusters and 9 singletons within the dataset. A subset of the chemical conditions and mutations that had interesting chemical-genetic interactions were chosen for further analysis and these are highlighted with colored boxes. A22 and mecillinam (second column group from the left, purple) had widespread positive S-scores that were concentrated in, but not limited to, cluster 14. The  $\beta$ -P153L mutation (cluster 14, purple) was investigated further for its resistance to mecillinam and A22. Alcohol treatments (third column group from the left) had widespread negative S-scores that were concentrated in, but not limited to, cluster 14 and cluster 15. Sensitivity to select aminoglycosides (gentamicin, tobramycin, and spectinomycin; sixth column group from the left) was enriched in cluster 14 (**Figure 3B**). Resistance to tetracycline (tetracycline, doxycycline, and minocycline; fourth column group from the left) (**Figure 3C**) and macrolide (erythromycin, azithromycin, and clarithromycin; fifth column group from the left) antibiotics was enriched in cluster 15. Sensitivity to tetracyclines was enriched in cluster 16 (**Figure 3C**). Sensitivity to trimethoprim and hydroxyurea (right-most column group) was enriched in cluster 22 and cluster 23. Resistance to trimethoprim and hydroxyurea was enriched in cluster 16. Sensitivity of  $\beta$ - $\Delta$ SI2 (orange) to ethanol, trimethoprim, and hydroxyurea (orange) was confirmed using liquid growth curves (**Figure 4A,B**). The high correlations among  $\beta$ '-P1022L,  $\beta$ '-N458A, and  $\beta$ -I966S (cluster 16, yellow) were used to predict a hyper-attenuation phenotype for  $\beta$ '-N458A and  $\beta$ -I966S (**Figure 4C,D**). Resistance of  $\beta$ -P153L to mecillinam and A22 (**Figure 5A**) was confirmed using liquid growth curves (**Figure 6A**).

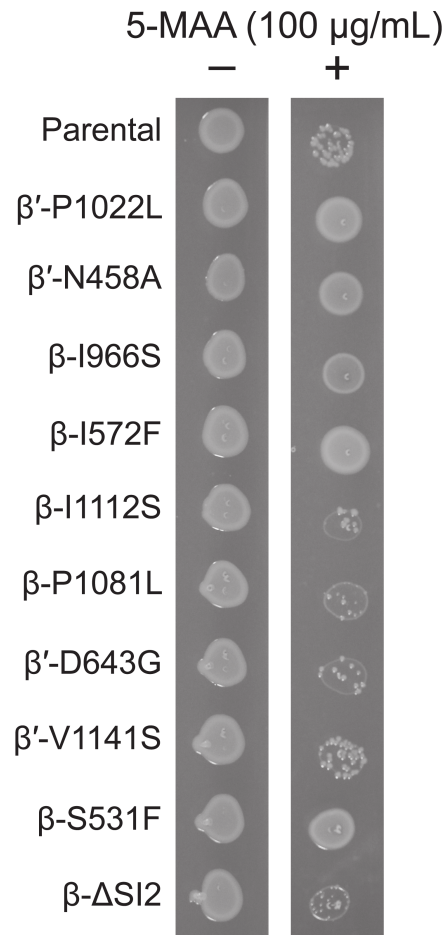

**Supplemental Figure 2: 5-MAA resistance in transcription mutants, Related to Figure 4.**

In a  $\Delta trpR$  background, expression of the *trp* locus is mainly controlled by attenuation. Hyper-attenuation reduces *trp* expression and makes cells resistant to a toxic analogue of a tryptophan biosynthesis intermediate, 5-methyl anthranilic acid (5-MAA). The genotype of the parental strain (Parental) in this experiment is MG1655 *rpoBC-cat*  $\Delta trpR$ . All other strains are derivatives of this parental strain with the specified mutation in core RNA polymerase. Mutations in  $\beta$  include  $\beta$ -I966S,  $\beta$ - $\Delta\text{SI2}$ ,  $\beta$ -P1081L, and  $\beta$ -I1112S. Mutations in the active site/secondary channel include  $\beta'$ -N458A,  $\beta'$ -D643G, and  $\beta'$ -V1141S. The  $\text{Rif}^R$  mutations are  $\beta$ -S531F and  $\beta$ -I572F. Resistance to 5-MAA at 100  $\mu\text{g}/\text{mL}$  is represented by consistent density throughout the 3  $\mu\text{L}$  spot. Sensitive strains in this experiment show lower overall density and the occurrence of suppressors as small colonies. The 5-MAA<sup>R</sup> phenotype was strongest in  $\beta'$ -P1022L,  $\beta'$ -N458A,  $\beta$ -I966S,  $\beta$ -S531F, and  $\beta$ -I572F.

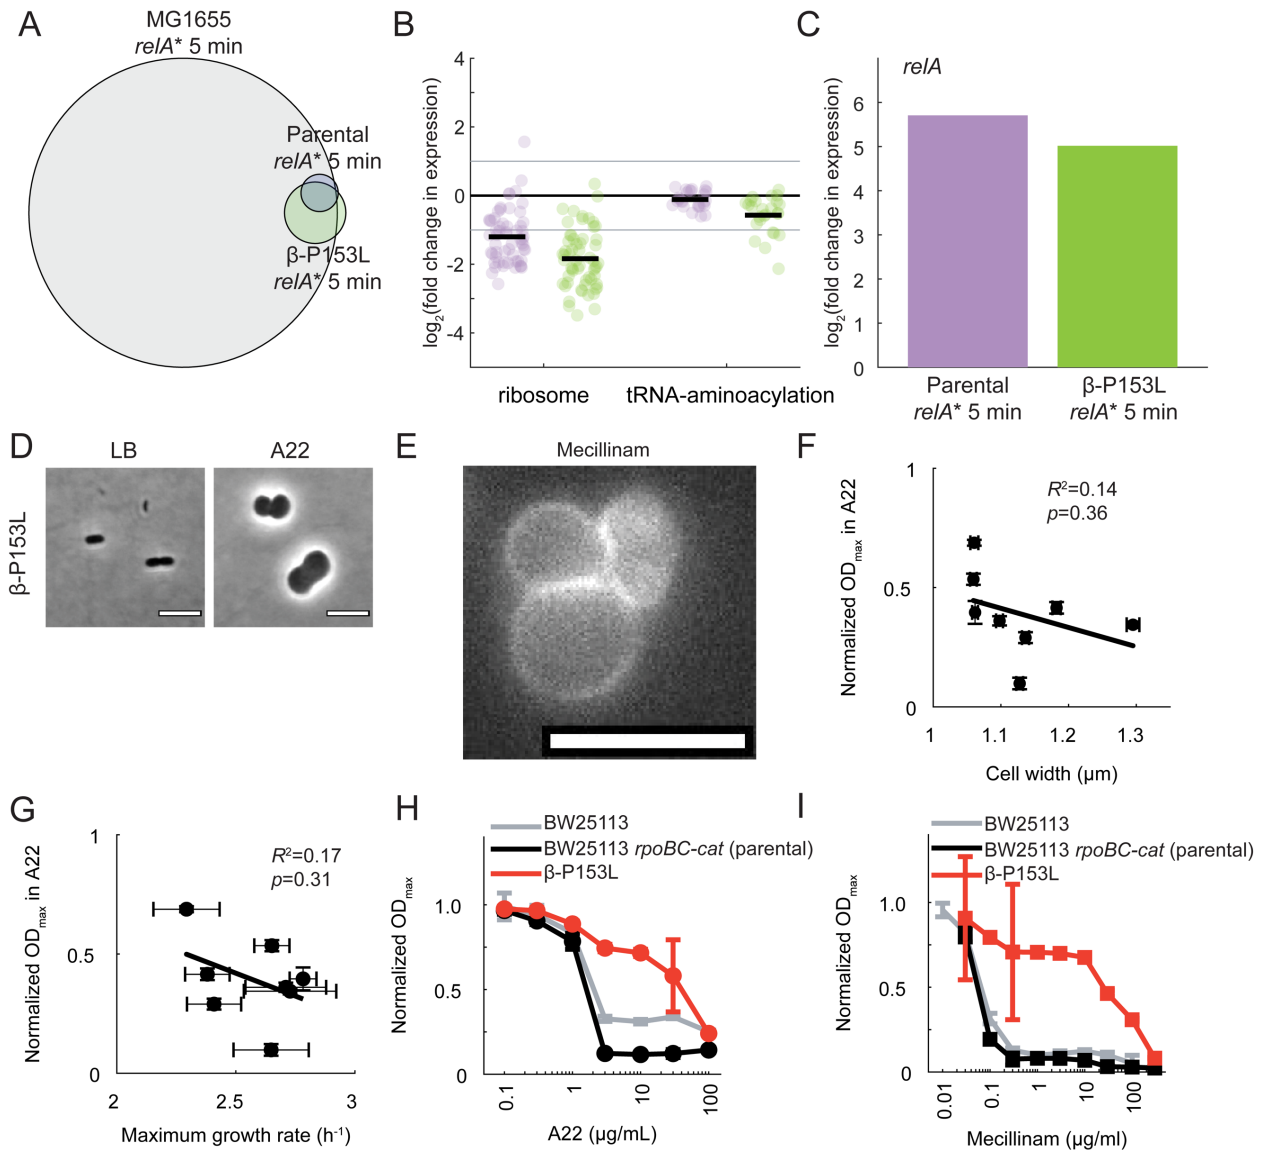

**Supplemental Figure 3: Induction of *relA\** in  $\beta$ -P153L leads to repression of translation-related genes,  $\beta$ -P153L grows as cocci with a cell wall in A22 and mecillinam, A22 resistance among  $M^+$  mutants is not correlated with either cell width or growth rate, and  $\beta$ -P153L does not simply correct the cell elongation phenotype of its parental strain. Related to Figures 5, 6, 7.**

A) There is extensive overlap in the significantly differentially expressed genes due to induction of *relA\** for 5 min in  $\beta$ -P153L (green, data collected in this study), the parental strain (purple, data collected in this study), and MG1655 (gray, from (Sanchez-Vazquez et al., 2019)). The reference dataset (gray) has a more extensive response than the experiments in this study.

- B)  $\beta$ -P153L (green) and its parental strain (purple) experienced repression of ribosome-related (ribosome) and tRNA aminoacylation-related genes after induction of *relA*<sup>\*</sup>. These data are consistent with effects of the stringent response. Fold-changes were more pronounced in  $\beta$ -P153L than in the parental strain. Individual genes are plotted as circles. The set average is shown as a solid black line. Two-fold changes in expression are marked with a solid gray line.
- C) The stronger effects of *relA*<sup>\*</sup> induction in  $\beta$ -P153L (**A,B**) were not due to higher expression of *relA*<sup>\*</sup>. Despite having a stronger repressive effect on translation-related genes, *relA* induction was slightly lower in  $\beta$ -P153L compared to its parental strain.
- D) Although  $\beta$ -P153L prevents death due to A22 treatment,  $\beta$ -P153L cells still lost rod shape in the presence of A22. Representative phase-contrast images of log-phase  $\beta$ -P153L cells are shown in LB (top) and LB+15  $\mu$ g/mL A22 (bottom). Scale bar: 5  $\mu$ m.
- E)  $\beta$ -P153L cells treated with mecillinam still have a cell wall and grow as cocci. Log-phase  $\beta$ -P153L cells grown in the presence of 15  $\mu$ g/mL mecillinam were pulse-labeled with the fluorescent D-amino acid analogue HADA. Incorporation of HADA into the cell periphery demonstrated that coccoidal  $\beta$ -P153L cells retain a cell wall during mecillinam treatment. Scale bar: 5  $\mu$ m.
- F) Resistance to A22 was not correlated with cell width. The maximum OD<sub>600</sub> of the 7 M<sup>+</sup> mutants and their parental control in LB+13.5  $\mu$ g/mL A22 was extracted from growth curves and normalized by growth curves of the same strain in LB without antibiotic. The normalized OD<sub>max</sub> of the 7 mutants was not correlated with the average cell width of log-phase cells grown in LB ( $R^2=0.14$ ,  $p=0.36$ ).
- G) The normalized OD<sub>max</sub> calculated as in (F) was not correlated with maximum growth rate extracted from growth curves of the mutants in LB without A22 ( $R^2=0.17$ ,  $p=0.31$ ).
- H)  $\beta$ -P153L is highly resistant to A22, while both its parental strain (BW25113 *rpoBC-cat*) and BW25113 are susceptible. Maximum OD<sub>600</sub> (OD<sub>max</sub>) was extracted from growth curves of  $\beta$ -P153L (red), its parental control (black), and BW25113 (gray) and normalized by the OD<sub>max</sub> of each strain in the absence of antibiotic. The growth

medium for all strains was LB. Error bars represent 95% confidence intervals. Data for  $\beta$ -P153L and the parental strain are identical to those in **Figure 6A** and are replotted here for comparison to BW25113. The parental strain halts growth earlier than BW25113 when treated with A22, but the concentration at which A22 becomes lethal is identical for the two strains within the resolution of this experiment. By contrast to both wild-type strains,  $\beta$ -P153L was highly resistant to A22.

- l)  $\beta$ -P153L is highly resistant to mecillinam, while both its parental strain (BW25113 *rpoBC-cat*) and BW25113 are susceptible. Data is as in **(H)**, except strains were treated with mecillinam instead of A22. The concentration at which mecillinam became lethal was identical for BW25113 and the parental strain within the resolution of this experiment. By contrast to both wild-type strains,  $\beta$ -P153L was highly resistant to mecillinam.

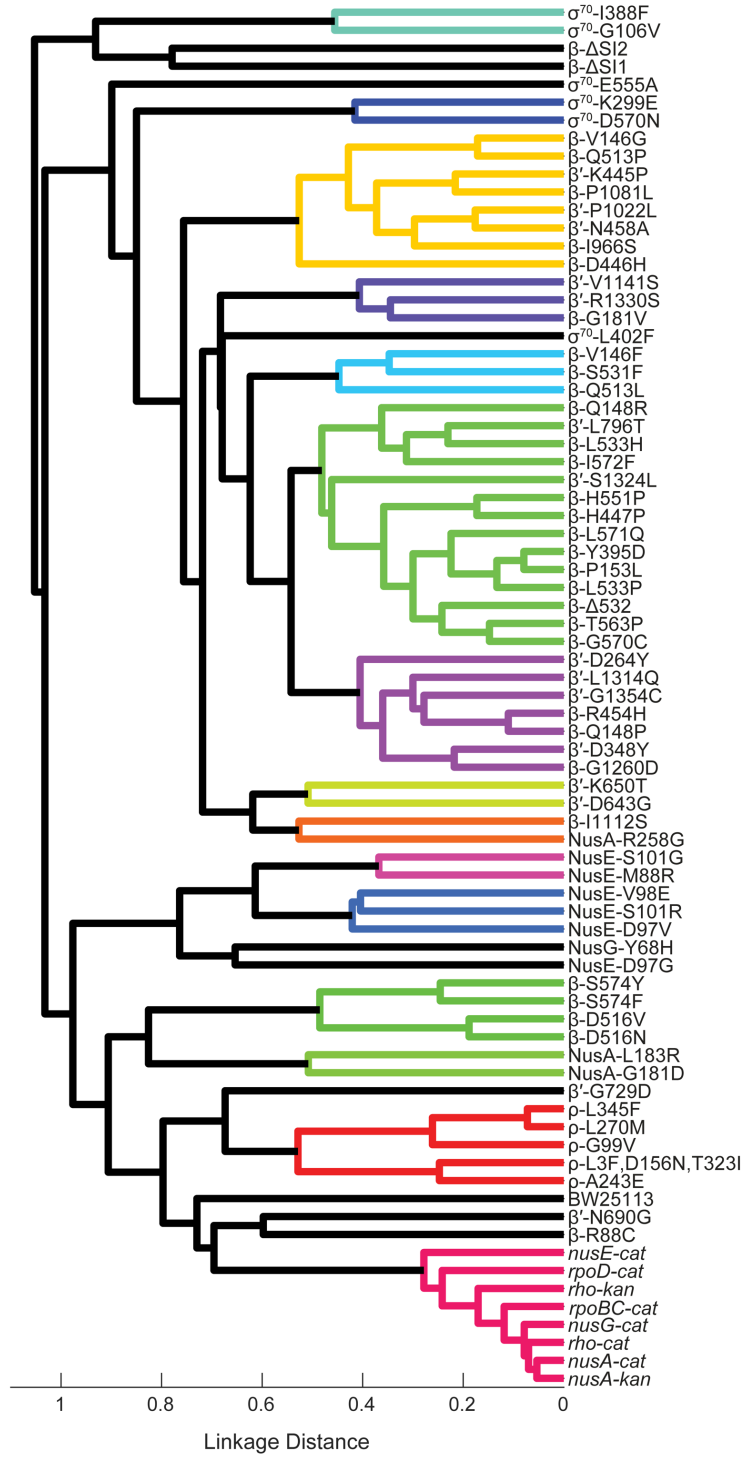

$\sigma^{70}$ -I388F  
 $\sigma^{70}$ -G106V  
 $\beta$ - $\Delta$ SI2  
 $\beta$ - $\Delta$ SI1  
 $\sigma^{70}$ -E555A  
 $\sigma^{70}$ -K299E  
 $\sigma^{70}$ -D570N  
 $\beta$ -V146G  
 $\beta$ -Q513P  
 $\beta$ -K445P  
 $\beta$ -P1081L  
 $\beta$ -P1022L  
 $\beta$ -N458A  
 $\beta$ -I966S  
 $\beta$ -D446H  
 $\beta$ -V1141S  
 $\beta$ -R1330S  
 $\beta$ -G181V  
 $\sigma^{70}$ -L402F  
 $\beta$ -V146F  
 $\beta$ -S531F  
 $\beta$ -Q513L  
 $\beta$ -Q148R  
 $\beta$ -L796T  
 $\beta$ -L533H  
 $\beta$ -I572F  
 $\beta$ -S1324L  
 $\beta$ -H551P  
 $\beta$ -H447P  
 $\beta$ -L571Q  
 $\beta$ -Y395D  
 $\beta$ -P153L  
 $\beta$ -L533P  
 $\beta$ - $\Delta$ S32  
 $\beta$ -T563P  
 $\beta$ -G570C  
 $\beta$ -D264Y  
 $\beta$ -L1314Q  
 $\beta$ -G1354C  
 $\beta$ -R454H  
 $\beta$ -Q148P  
 $\beta$ -D348Y  
 $\beta$ -G1260D  
 $\beta$ -K650T  
 $\beta$ -D643G  
 $\beta$ -I1112S  
NusA-R258G  
NusE-S101G  
NusE-M88R  
NusE-V98E  
NusE-S101R  
NusE-D97V  
NusG-Y68H  
NusE-D97G  
 $\beta$ -S574Y  
 $\beta$ -S574F  
 $\beta$ -D516V  
 $\beta$ -D516N  
NusA-L183R  
NusA-G181D  
 $\beta$ -G729D  
 $\rho$ -L345F  
 $\rho$ -L270M  
 $\rho$ -G99V  
 $\rho$ -L3F\_D156N,T323I  
 $\rho$ -A243E  
BW25113  
 $\beta$ -N690G  
 $\beta$ -R88C  
*nusE-cat*  
*rpoD-cat*  
*rho-kan*  
*rpoBC-cat*  
*nusG-cat*  
*rho-cat*  
*nusA-cat*  
*nusA-kan*

**Supplemental Figure 4: Dendrogram of transcription mutants including the marker-only alleles, Related to Quantification and Statistical Analysis in STAR Methods, subsection, Statistical analysis to generate S-scores.**

Transcription mutants were hierarchically clustered according to shared sensitivities in our chemical-genetic dataset using the same approach as in **Supplemental Figure 1 (STAR Methods)**. However, in this figure the marker-only alleles were not filtered out of the dataset before hierarchical clustering. Clusters defined based on the significance threshold are colored. The cluster number corresponds to those used in the main text. Re-analysis including the marker-only alleles identified the same 14 clusters and 9 singletons of transcription mutants as in **Supplemental Figure 1**. The marker-only alleles form a single cluster (bottom of the dendrogram), while BW25113 (true wild-type) and transcription mutants  $\beta$ -R88C and  $\beta'$ -N690C are grouped as singleton outliers.



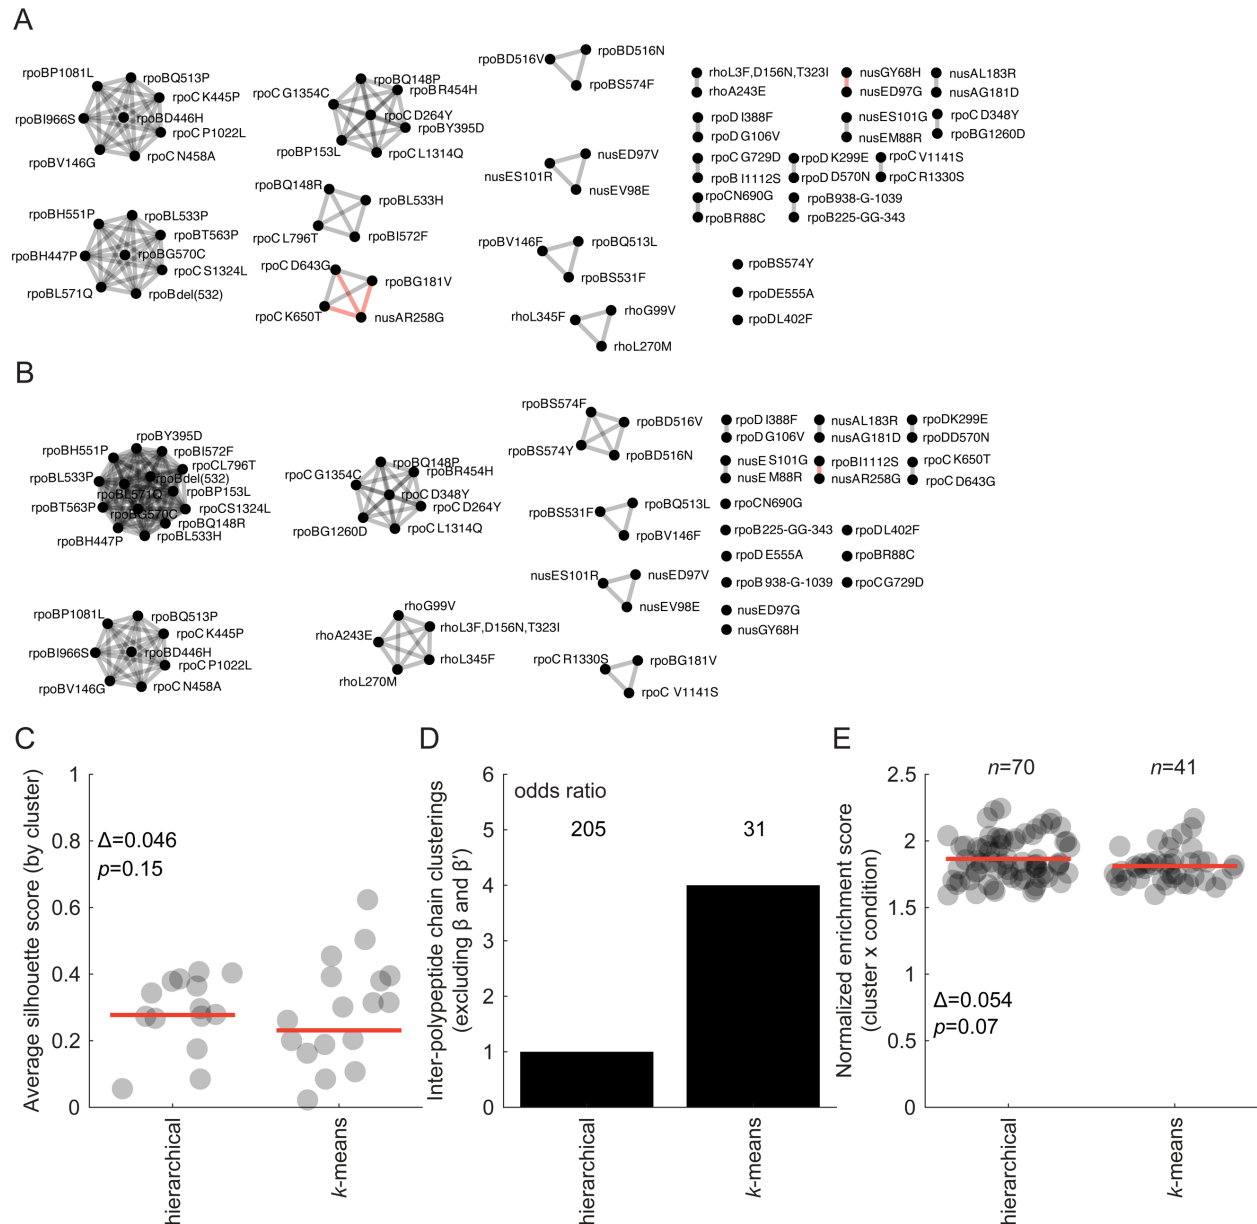

**Supplemental Figure 5: *k*-means clustering of the transcription mutants using *k*=23, Related to Quantification and Statistical Analysis in STAR Methods, subsection, Defining and visualizing clusters. Results of clustering methods are compared**

A) The results from using the number of “clusters” (14 clusters + 9 singletons, *k*=23) defined by hierarchical clustering as an input to a *k*-means clustering algorithm. The best solution from 10,000 iterations is shown. There are more clusters of a smaller size in core RNA polymerase. There are more inter-peptide chain clustering pairs outside of  $\beta$  and  $\beta'$ . These are highlighted with red edges. There

are fewer singletons. However, quantitative comparison between the two clustering approaches reveals that there is reasonable overlap in the results, with an adjusted mutual information score of 0.70.

- B) For comparison, the clusters identified in the paper are shown. These clusters were identified using hierarchical clustering and a statistically defined cutoff.
- C) The average silhouette scores are plotted for the hierarchical and k-means approaches. Plotted circles are the average silhouette score for a cluster. The red lines are the average silhouette score across the entire dataset. The total average difference between clustering methods is 0.046 ( $p=0.15$ ).
- D) The number of pair-wise co-clustering interactions involving mutations in different polypeptide chains (that don't include  $\beta$  and  $\beta'$ ) are plotted as bar plots. For the k-means, there are 4 pairwise interactions, 3 of which come from the co-clustering of NusA-R258G with mutations in the core polymerase (**A**). In the hierarchical clustering dataset, the sole inter-chain clustering interaction is that between NusA-R258G and  $\beta$ -I1112S (**B**). Above each bar plot is the odds ratio (*OR*) for overlap between mutations co-clustering and occurring in the same polypeptide chain ( $OR=205$  for hierarchical and  $OR=31$  for *k*-means clustering).
- E) GSEA was used to look for enrichments of S-scores in particular conditions within the clusters defined by the two methods. If the multiple-hypothesis-corrected *p* value was less than 0.05, the enrichment was considered significant and the value of its normalized enrichment score (NES) is plotted. There are more significant enrichments for hierarchical ( $n=70$ ) compared to k-means ( $n=41$ ) clustering, and the average NES is 0.054 higher for hierarchical clustering ( $p=0.07$ ).

## Supplemental Tables

**Supplemental Table 2: Conditions used in screen, Related to Figure 1.**

| <b>Stress condition *</b>                                                          | <b>Concentration (current screen)</b> | <b>Concentration (matched condition from Keio library)</b> |
|------------------------------------------------------------------------------------|---------------------------------------|------------------------------------------------------------|
| 1-Butanol                                                                          | 1% (v/v)                              | 1% (v/v)                                                   |
| 10 °C                                                                              | N.A.                                  | N.A.                                                       |
| 25 °C                                                                              | N.A.                                  | N.A.                                                       |
| A22                                                                                | 5 µg/mL                               | 5 µg/mL                                                    |
| Amoxicillin                                                                        | 1.5 µg/mL                             | 1.5 µg/mL                                                  |
| Ampicillin                                                                         | 4 µg/mL                               | 4 µg/mL                                                    |
| Azelaic acid                                                                       | 1 mg/mL                               | 1 mg/mL                                                    |
| Azidothymidine                                                                     | 2.5 ng/mL                             | 500 pg/mL                                                  |
| Azithromycin                                                                       | 1 µg/mL                               | 1 µg/mL                                                    |
| Bicyclomycin                                                                       | 20 µg/mL                              | 20 µg/mL                                                   |
| Bile salts                                                                         | 2% (w/v)                              | 2% (w/v)                                                   |
| Blasticidin S                                                                      | 33 µg/mL                              | 33 µg/mL                                                   |
| Bleomycin                                                                          | 500 ng/mL                             | 1 µg/mL                                                    |
| Carbonyl cyanide <i>m</i> -chlorophenyl hydrazine (CCCP)                           | 2 µg/mL                               | 2 µg/mL                                                    |
| Cefaclor                                                                           | 2 µg/mL                               | 3 µg/mL                                                    |
| Cefoxitin                                                                          | 500 ng/mL                             | 750 ng/mL                                                  |
| Cefsulodin                                                                         | 24 µg/mL                              | 12 µg/mL                                                   |
| Chlorhexidine                                                                      | 5 µg/mL                               | 5 µg/mL                                                    |
| Cinoxacin                                                                          | 3 µg/mL                               | 3 µg/mL                                                    |
| Ciprofloxacin                                                                      | 1 ng/mL                               | 1 ng/mL                                                    |
| Clarithromycin                                                                     | 5 µg/mL                               | 5 µg/mL                                                    |
| Copper(II)                                                                         | 2 mM                                  | 2 mM                                                       |
| Deoxycholic acid                                                                   | 1% (w/v)                              | 1% (w/v)                                                   |
| Dibucaine                                                                          | 1.2 mM                                | 800 µM                                                     |
| Dimethyl sulfoxide (DMSO)                                                          | 9.5% (v/v)                            | 9.5% (v/v)                                                 |
| Doxycycline                                                                        | 750 ng/mL                             | 750 ng/mL                                                  |
| Erythromycin                                                                       | 5 µg/mL                               | 5 µg/mL                                                    |
| Ethanol                                                                            | 4% (w/v)                              | 6% (w/v)                                                   |
| Ethidium bromide                                                                   | 50 µg/mL                              | 50 µg/mL                                                   |
| Ethylene glycol-bis(β-aminoethyl ether)- <i>N,N,N',N'</i> -tetraacetic acid (EGTA) | 1 mM                                  | 1 mM                                                       |
| Ethylenediaminetetraacetic acid (EDTA)                                             | 1 mM                                  | 1 mM                                                       |
| Fusidic acid                                                                       | 50 µg/mL                              | 50 µg/mL                                                   |
| Gentamicin                                                                         | 100 ng/mL                             | 50 ng/mL                                                   |
| Gliotoxin                                                                          | 10 µg/mL                              | 10 µg/mL                                                   |
| Guanidine hydrochloride                                                            | 30 mM                                 | 30 mM                                                      |
| Holomycin                                                                          | 2.5 µg/mL                             | 2.5 µg/mL                                                  |
| Hydroxyurea                                                                        | 5 mM                                  | 5 mM                                                       |
| Isopentanol                                                                        | 0.5% (v/v)                            | 0.5% (v/v)                                                 |
| Isopropanol                                                                        | 5% (v/v)                              | 5% (v/v)                                                   |
| Kasugamycin                                                                        | 20 µg/mL                              | 20 µg/mL                                                   |
| M9 minimal media 0.2% glucose with 5-fluorouridine                                 | 250 ng/mL                             | 250 ng/mL                                                  |
| M9 minimal media 0.2% glucose with 5-methylanthranilic acid                        | 20 µg/mL                              | 20 µg/mL                                                   |
| M9 minimal media 0.2% glucose with 5-methyltryptophan                              | 20 µg/mL                              | 20 µg/mL                                                   |
| M9 minimal media 0.2% glucose with casamino acids                                  | 0.4% (w/v)                            | 0.4% (w/v)                                                 |
| M9 minimal media 0.2% glucose with UV                                              | 12 sec                                | 12 sec                                                     |
| M9 minimal media with acetate                                                      | 0.6% (w/v)                            | 0.6% (w/v)                                                 |
| M9 minimal media with glucosamine                                                  | 0.2% (w/v)                            | 0.2% (w/v)                                                 |
| M9 minimal media with glucose                                                      | 0.2% (w/v)                            | 0.2% (w/v)                                                 |
| M9 minimal media with glycerol                                                     | 0.4% (w/v)                            | 0.4% (w/v)                                                 |
| M9 minimal media with maltose                                                      | 0.1% (w/v)                            | 0.1% (w/v)                                                 |
| M9 minimal media with succinate                                                    | 0.3% (w/v)                            | 0.3% (w/v)                                                 |
| Mecillinam                                                                         | 120 ng/mL                             | 120 ng/mL                                                  |

|                                         |                         |                         |
|-----------------------------------------|-------------------------|-------------------------|
| Minocycline                             | 1 µg/mL                 | 1 µg/mL                 |
| Nalidixic acid                          | 1.5 µg/mL               | 1 µg/mL                 |
| Nitrofurantoin                          | 1.5 µg/mL               | 2 µg/mL                 |
| Novobiocin                              | 12 µg/mL                | 30 µg/mL                |
| Phenazine methosulfate                  | 100 µM                  | 50 µM                   |
| Phenol                                  | 0.1% (v/v)              | 0.1% (v/v)              |
| Polymyxin B                             | 4 µg/mL                 | 2 µg/mL                 |
| Procaine                                | 30 mM                   | 30 mM                   |
| Pseudomonic acid A                      | 36 µg/mL                | 36 µg/mL                |
| Pyocyanin                               | 10 µg/mL                | 10 µg/mL                |
| Rifampicin                              | 4 µg/mL                 | 4 µg/mL                 |
|                                         | 0.5% (w/v)              | 0.5% (w/v)              |
| SDS and EDTA combination treatment      | (SDS);<br>500 µM (EDTA) | (SDS);<br>500 µM (EDTA) |
| Serine hydroxamate                      | 600 µg/mL               | 600 µg/mL               |
| Silver(II)                              | 1 µM                    | 1 µM                    |
| Sodium chloride                         | 330 mM                  | 450 mM                  |
| Sodium dodecyl sulfate (SDS)            | 1% (w/v)                | 1% (w/v)                |
| Sodium fluoride                         | 100 mM                  | 100 mM                  |
| Spectinomycin                           | 4 µg/mL                 | 6 µg/mL                 |
| Spiramycin                              | 20 µg/mL                | 20 µg/mL                |
| Streptonigrin                           | 500 ng/mL               | 500 ng/mL               |
| Sulfamonomethoxine                      | 100 µg/mL               | 100 µg/mL               |
| <i>tert</i> -Butyl alcohol              | 5% (v/v)                | 5% (v/v)                |
| Tetracycline                            | 500 ng/mL               | 500 ng/mL               |
| Thiolutin                               | 7 µg/mL                 | 7 µg/mL                 |
| Tobramycin                              | 50 ng/mL                | 100 ng/mL               |
| Trimethoprim                            | 100 ng/mL               | 300 ng/mL               |
| Tunicamycin                             | 7.5 µg/mL               | 7.5 µg/mL               |
| Urea                                    | 750 mM                  | 750 mM                  |
| Urea                                    | 320 mM                  | 320 mM                  |
| Irradiation with ultraviolet light (UV) | 12 sec                  | 6 sec                   |
| Vancomycin                              | 50 µg/mL                | 50 µg/mL                |

Antibiotics were added to agar plates at the specified concentration and colony arrays were pinned onto the solid agar surface. \*: Unless otherwise noted, the medium used was LB and the growth temperature was 37 °C. N.A.: Not applicable.

**Supplemental Table 3: Conditional enrichments among transcription mutant clusters and pre-defined classes, Related to Figures 3,5.**

| Condition                                             | NES   | p-value (adjusted)    | Individually significant |
|-------------------------------------------------------|-------|-----------------------|--------------------------|
| <b>Cluster2</b>                                       |       |                       |                          |
| No significant enrichments                            |       |                       |                          |
| <b>Cluster12</b>                                      |       |                       |                          |
| No significant enrichments                            |       |                       |                          |
| <b>Cluster13</b>                                      |       |                       |                          |
| No significant enrichments                            |       |                       |                          |
| <b>Cluster14</b>                                      |       |                       |                          |
| Chlorhexidine                                         | -2.1  | 0.00                  | 2                        |
| Azelaic acid                                          | -2.02 | 0.00                  | 8                        |
| Spectinomycin                                         | -2.01 | 0.00                  | 8                        |
| Gentamicin                                            | -1.94 | 0.00                  | 5                        |
| Tobramycin                                            | -1.84 | $3.58 \times 10^{-3}$ | 7                        |
| Silver(II)                                            | -1.82 | 0.00                  | 3                        |
| Copper(II)                                            | -1.76 | $2.03 \times 10^{-2}$ | 4                        |
| Holomycin                                             | -1.75 | $3.04 \times 10^{-2}$ | 1                        |
| Polymyxin B                                           | -1.74 | $1.00 \times 10^{-2}$ | 8                        |
| Isopropanol                                           | -1.74 | $1.15 \times 10^{-2}$ | 6                        |
| 25 °C                                                 | -1.71 | $1.11 \times 10^{-2}$ | 10                       |
| M9 minimal media 0.2% glucose with casamino acids     | -1.7  | $1.88 \times 10^{-2}$ | 8                        |
| Tunicamycin                                           | -1.68 | 0.00                  | 7                        |
| Ethanol                                               | -1.66 | $8.21 \times 10^{-3}$ | 11                       |
| 1-Butanol                                             | -1.61 | $2.00 \times 10^{-2}$ | 4                        |
| M9 minimal media with glycerol                        | 1.62  | $4.03 \times 10^{-2}$ | 3                        |
| M9 minimal media with maltose                         | 1.64  | $4.75 \times 10^{-2}$ | 7                        |
| M9 minimal media with glucosamine                     | 1.66  | $2.37 \times 10^{-2}$ | 6                        |
| M9 minimal media with succinate                       | 1.79  | $9.89 \times 10^{-3}$ | 6                        |
| M9 minimal media 0.2% glucose with 5-fluorouridine    | 1.82  | $2.21 \times 10^{-2}$ | 2                        |
| M9 minimal media 0.2% glucose with 5-methyltryptophan | 1.82  | $9.94 \times 10^{-3}$ | 2                        |
| Phenazine methosulfate                                | 1.85  | $1.55 \times 10^{-2}$ | 3                        |
| Bleomycin                                             | 1.95  | 0.00                  | 1                        |
| Mecillinam                                            | 1.96  | $3.97 \times 10^{-3}$ | 12                       |
| A22                                                   | 2.08  | 0.00                  | 5                        |
| <b>Cluster15</b>                                      |       |                       |                          |
| Isopentanol                                           | -1.79 | $2.03 \times 10^{-2}$ | 1                        |
| <i>tert</i> -Butyl alcohol                            | -1.7  | $3.04 \times 10^{-2}$ | 2                        |
| Azithromycin                                          | 1.73  | $9.94 \times 10^{-3}$ | 1                        |
| Guanidine hydrochloride                               | 1.77  | $1.61 \times 10^{-2}$ | 2                        |
| Pseudomonic acid A                                    | 1.82  | $9.38 \times 10^{-3}$ | 5                        |
| Tetracycline                                          | 1.85  | $3.04 \times 10^{-2}$ | 1                        |
| Doxycycline                                           | 1.99  | 0.00                  | 4                        |
| <b>Cluster16</b>                                      |       |                       |                          |
| Tetracycline                                          | -1.97 | $1.00 \times 10^{-2}$ | 1                        |
| Pseudomonic acid A                                    | -1.82 | $2.42 \times 10^{-2}$ | 3                        |
| Serine hydroxamate                                    | -1.82 | $2.00 \times 10^{-2}$ | 2                        |
| Doxycycline                                           | -1.77 | $2.73 \times 10^{-2}$ | 1                        |
| Sulfamonomethoxine                                    | 2.08  | 0.00                  | 1                        |
| <b>Cluster20</b>                                      |       |                       |                          |
| Rifampicin                                            | 1.61  | $7.91 \times 10^{-3}$ | 4                        |
| Chlorhexidine                                         | 1.72  | $4.75 \times 10^{-2}$ | 1                        |
| <b>Cluster23</b>                                      |       |                       |                          |
| Rifampicin                                            | -2.03 | 0.00                  | 4                        |
| Mecillinam                                            | -2    | $4.08 \times 10^{-2}$ | 1                        |
| Sodium fluoride                                       | -1.91 | $2.73 \times 10^{-2}$ | 3                        |
| Ciprofloxacin                                         | -1.86 | $1.00 \times 10^{-2}$ | 1                        |
| Ethidium bromide                                      | -1.81 | $3.04 \times 10^{-2}$ | 2                        |

|                                                            |       |                       |    |
|------------------------------------------------------------|-------|-----------------------|----|
| Azidothymidine                                             | -1.75 | $3.04 \times 10^{-2}$ | 2  |
| Spiramycin                                                 | -1.72 | $3.40 \times 10^{-2}$ | 1  |
| Dibucaine                                                  | -1.63 | $3.18 \times 10^{-2}$ | 1  |
| Bicyclomycin                                               | -1.6  | $1.25 \times 10^{-2}$ | 5  |
| Cinoxacin                                                  | 1.66  | $3.95 \times 10^{-2}$ | 1  |
| <b>M+</b>                                                  |       |                       |    |
| <i>tert</i> -Butyl alcohol                                 | -2.16 | 0.00                  | 2  |
| Holomycin                                                  | -2.14 | 0.00                  | 2  |
| Isopropanol                                                | -2.08 | 0.00                  | 8  |
| Isopentanol                                                | -2.02 | $4.10 \times 10^{-3}$ | 1  |
| Polymyxin B                                                | -2.01 | 0.00                  | 9  |
| 25 °C                                                      | -1.88 | 0.00                  | 13 |
| Chlorhexidine                                              | -1.86 | $3.40 \times 10^{-2}$ | 2  |
| 10 °C                                                      | -1.8  | $6.04 \times 10^{-3}$ | 7  |
| 1-Butanol                                                  | -1.78 | 0.00                  | 9  |
| M9 minimal media 0.2% glucose with casamino acids          | -1.75 | $1.25 \times 10^{-2}$ | 10 |
| Azelaic acid                                               | -1.73 | $1.90 \times 10^{-2}$ | 7  |
| Tunicamycin                                                | -1.72 | 0.00                  | 8  |
| Silver(II)                                                 | -1.71 | $2.03 \times 10^{-2}$ | 4  |
| Spectinomycin                                              | -1.63 | $3.04 \times 10^{-2}$ | 8  |
| Ethanol                                                    | -1.56 | $2.87 \times 10^{-2}$ | 10 |
| M9 minimal media 0.2% glucose with 5-methyltryptophan      | 1.65  | $4.57 \times 10^{-2}$ | 4  |
| M9 minimal media with glycerol                             | 1.68  | $2.03 \times 10^{-2}$ | 3  |
| Bleomycin                                                  | 1.73  | $3.40 \times 10^{-2}$ | 1  |
| M9 minimal media 0.2% glucose with 5-methylantranilic acid | 1.77  | $1.90 \times 10^{-2}$ | 9  |
| Mecillinam                                                 | 1.83  | $1.00 \times 10^{-2}$ | 10 |
| Guanidine hydrochloride                                    | 1.88  | $4.82 \times 10^{-3}$ | 2  |
| Pseudomonic acid A                                         | 1.89  | $2.03 \times 10^{-2}$ | 9  |
| M9 minimal media with glucosamine                          | 1.91  | 0.00                  | 7  |
| M9 minimal media with succinate                            | 1.91  | 0.00                  | 7  |
| M9 minimal media with maltose                              | 1.92  | 0.00                  | 8  |
| Doxycycline                                                | 1.99  | $5.49 \times 10^{-3}$ | 4  |
| Tetracycline                                               | 1.99  | $1.55 \times 10^{-2}$ | 1  |
| A22                                                        | 2.06  | 0.00                  | 7  |
| <b>5-MAA<sup>R</sup></b>                                   |       |                       |    |
| No significant enrichments                                 |       |                       |    |
| <b>Ethanol-tolerant</b>                                    |       |                       |    |
| Sodium fluoride                                            | -1.96 | $1.52 \times 10^{-2}$ | 3  |
| Sulfamonomethoxine                                         | -1.9  | 0.00                  | 1  |
| Azidothymidine                                             | -1.81 | $2.73 \times 10^{-2}$ | 1  |
| Hydroxyurea                                                | -1.6  | $2.42 \times 10^{-2}$ | 4  |
| Urea                                                       | -1.58 | $4.57 \times 10^{-2}$ | 4  |
| Trimethoprim                                               | -1.57 | $3.02 \times 10^{-2}$ | 5  |
| <b>Galr</b>                                                |       |                       |    |
| No significant enrichments                                 |       |                       |    |
| <b>Mpa</b>                                                 |       |                       |    |
| No significant enrichments                                 |       |                       |    |

**Condition:** name of the stressor. **NES:** normalized enrichment score as output by GSEA v. 3.0. Larger magnitude scores indicate higher enrichment. Negative NES values correspond to enrichment for negative S-scores. Positive NES values correspond to enrichment for positive S-scores. Enriched conditions are sorted according to NES. **p-value (adjusted):** Benjamini-Hochberg FDR-corrected p-values (corrected from nominal p-values output by GSEA). **Individually significant:** Significant S-scores were defined using an independent method to GSEA using a cut-off that controlled the FDR at 5% (Methods) (Nichols et al., 2011). The number of mutations within the class that were significant according to this metric are listed. A cluster-chemical enrichment with high NES but few individually significant mutations may reflect a clear and statistically significant enrichment for low-magnitude S-scores within the mutant cluster. Alternatively, the enrichment may be driven by a subset of mutants within the cluster with high-magnitude S-scores. Cluster numbers being analyzed are as shown in **Figure 2B** and **Supplemental Figure 1**. **M+:** The class of M+

mutants. **5-MAA<sup>R</sup>**: The class of known hyper-attenuation mutants, as defined by resistance to 5-methyl-anthranilic acid in a  $\Delta trpR$  background. **Ethanol-tolerant**: Mutations found in strains evolved for tolerance to ethanol. **Gal<sup>r</sup>**: suppression of galactose sensitivity in *gal10 $\Delta$ 56* in RNA polymerase II from *Saccharomyces cerevisiae*. **Mpa**: mycophenolic acid sensitivity in RNA polymerase II from *Saccharomyces cerevisiae*.

**Supplemental Table 4: Mutations detected in whole genome resequencing of *ΔmreB* strains, Related to Figure 6.**

| Position                                                               | Mutation | Annotation                   | Gene                            | Description                                                                               | Notes                                           |
|------------------------------------------------------------------------|----------|------------------------------|---------------------------------|-------------------------------------------------------------------------------------------|-------------------------------------------------|
| <b>CAG67202, <i>rpoBC-cat</i>. Parental strain: BW25113 (CAG67001)</b> |          |                              |                                 |                                                                                           |                                                 |
| 1,484,419                                                              | Δ9 bp    | pseudogene (544-552/1001 nt) | <i>gapC</i> ←                   | pseudogene, GAP dehydrogenase; glyceraldehyde-3-phosphate dehydrogenase (second fragment) | SNP                                             |
| 4,029,087                                                              | A→T      | noncoding (197/1542 nt)      | <i>rrsA</i> →                   | 16S ribosomal RNA of <i>rrnA</i> operon                                                   | SNP                                             |
| 4,175,201                                                              | +T       | coding (4029/4029 nt)        | <i>rpoB</i> →                   | RNA polymerase, beta subunit                                                              | SNP associated with <i>cat</i> marker insertion |
| 4,175,845                                                              | +A       | coding (609/639 nt)          | <i>cat</i> →                    |                                                                                           | SNP associated with <i>cat</i> marker insertion |
| 4,175,857                                                              | +T       | coding (621/639 nt)          | <i>cat</i> →                    |                                                                                           | SNP associated with <i>cat</i> marker insertion |
| 4,175,978                                                              | +A       | intergenic (+103/-20)        | <i>cat</i> → /<br>→ <i>rpoC</i> | -/RNA polymerase, beta prime subunit                                                      | SNP associated with <i>cat</i> marker insertion |
| <b>CAG67104 <i>rpoBC-cat ΔmreB</i>. Parental strain: CAG67202</b>      |          |                              |                                 |                                                                                           |                                                 |
| 1,484,419                                                              | Δ9 bp    | pseudogene (544-552/1001 nt) | <i>gapC</i> ←                   | pseudogene, GAP dehydrogenase; glyceraldehyde-3-phosphate dehydrogenase (second fragment) | parental SNP                                    |
| 4,029,087                                                              | A→T      | noncoding (197/1542 nt)      | <i>rrsA</i> →                   | 16S ribosomal RNA of <i>rrnA</i> operon                                                   | parental SNP                                    |
| 4,175,201                                                              | +T       | coding (4029/4029 nt)        | <i>rpoB</i> →                   | RNA polymerase, beta subunit                                                              | parental SNP                                    |
| 4,175,845                                                              | +A       | coding (609/639 nt)          | <i>cat</i> →                    |                                                                                           | parental SNP                                    |
| 4,175,857                                                              | +T       | coding (621/639 nt)          | <i>cat</i> →                    |                                                                                           | parental SNP                                    |
| 4,175,978                                                              | +A       | intergenic (+103/-20)        | <i>cat</i> → /<br>→ <i>rpoC</i> | -/RNA polymerase, beta prime subunit                                                      | parental SNP                                    |
| 3393996-3394395                                                        | Δ400     | missing coverage             | <i>mreB</i>                     | cell wall structural complex MreBCD, actin-like component MreB                            | <i>ΔmreB::kan</i>                               |
| <b>CAG67105 <i>rpoBC-cat ΔmreB</i>. Parental strain: CAG67202</b>      |          |                              |                                 |                                                                                           |                                                 |
| 1,484,419                                                              | Δ9 bp    | pseudogene (544-552/1001 nt) | <i>gapC</i> ←                   | pseudogene, GAP dehydrogenase; glyceraldehyde-3-phosphate dehydrogenase (second fragment) | parental SNP                                    |
| 4,029,087                                                              | A→T      | noncoding (197/1542 nt)      | <i>rrsA</i> →                   | 16S ribosomal RNA of <i>rrnA</i> operon                                                   | parental SNP                                    |
| 4,175,201                                                              | +T       | coding (4029/4029 nt)        | <i>rpoB</i> →                   | RNA polymerase, beta subunit                                                              | parental SNP                                    |
| 4,175,845                                                              | +A       | coding (609/639 nt)          | <i>cat</i> →                    |                                                                                           | parental SNP                                    |
| 4,175,857                                                              | +T       | coding (621/639 nt)          | <i>cat</i> →                    |                                                                                           | parental SNP                                    |
| 4,175,978                                                              | +A       | intergenic (+103/-20)        | <i>cat</i> → /<br>→ <i>rpoC</i> | -/RNA polymerase, beta prime subunit                                                      | parental SNP                                    |



|                                                                 |       |                              |                                 |                                                                                           |                                                 |
|-----------------------------------------------------------------|-------|------------------------------|---------------------------------|-------------------------------------------------------------------------------------------|-------------------------------------------------|
| 3394017-3394392                                                 | Δ376  | missing coverage             | <i>mreB</i>                     | cell wall structural complex MreBCD, actin-like component MreB                            | Δ <i>mreB</i> ::kan                             |
| <b>CAG68095 β-P153L. Parental strain: CAG67202</b>              |       |                              |                                 |                                                                                           |                                                 |
| 1,484,419                                                       | Δ9 bp | pseudogene (544-552/1001 nt) | <i>gapC</i> ←                   | pseudogene, GAP dehydrogenase; glyceraldehyde-3-phosphate dehydrogenase (second fragment) | parental SNP                                    |
| 4,029,087                                                       | A→T   | noncoding (197/1542 nt)      | <i>rrsA</i> →                   | 16S ribosomal RNA of <i>rrnA</i> operon                                                   | parental SNP                                    |
| 4,171,630                                                       | C→T   | P153L (CCG→CTG)              | <i>rpoB</i> →                   | RNA polymerase, beta subunit                                                              | β-P153L                                         |
| 4,175,201                                                       | +T    | coding (4029/4029 nt)        | <i>rpoB</i> →                   | RNA polymerase, beta subunit                                                              | parental SNP                                    |
| 4,175,845                                                       | +A    | coding (609/639 nt)          | <i>cat</i> →                    |                                                                                           | parental SNP                                    |
| 4,175,857                                                       | +T    | coding (621/639 nt)          | <i>cat</i> →                    |                                                                                           | parental SNP                                    |
| 4,175,978                                                       | +A    | intergenic (+103/-20)        | <i>cat</i> → /<br>→ <i>rpoC</i> | -/RNA polymerase, beta prime subunit                                                      | parental SNP                                    |
| <b>CAG67106 β-P153L Δ<i>mreB</i>. Parental strain: CAG68095</b> |       |                              |                                 |                                                                                           |                                                 |
| 1,484,419                                                       | Δ9 bp | pseudogene (544-552/1001 nt) | <i>gapC</i> ←                   | pseudogene, GAP dehydrogenase; glyceraldehyde-3-phosphate dehydrogenase (second fragment) | parental SNP                                    |
| 3,430,056                                                       | G→A   | E60E (GAG→GAA)               | <i>trkA</i> →                   | NAD-binding component of TrK potassium transporter                                        | SNP in BW2592 genetically linked to <i>mreB</i> |
| 4,029,087                                                       | A→T   | noncoding (197/1542 nt)      | <i>rrsA</i> →                   | 16S ribosomal RNA of <i>rrnA</i> operon                                                   | parental SNP                                    |
| 4,171,630                                                       | C→T   | P153L (CCG→CTG)              | <i>rpoB</i> →                   | RNA polymerase, beta subunit                                                              | parental SNP                                    |
| 4,175,201                                                       | +T    | coding (4029/4029 nt)        | <i>rpoB</i> →                   | RNA polymerase, beta subunit                                                              | parental SNP                                    |
| 4,175,845                                                       | +A    | coding (609/639 nt)          | <i>cat</i> →                    |                                                                                           | parental SNP                                    |
| 4,175,857                                                       | +T    | coding (621/639 nt)          | <i>cat</i> →                    |                                                                                           | parental SNP                                    |
| 4,175,978                                                       | +A    | intergenic (+103/-20)        | <i>cat</i> → /<br>→ <i>rpoC</i> | -/RNA polymerase, beta prime subunit                                                      | parental SNP                                    |
| 3393999-3394409                                                 | Δ411  | missing coverage             | <i>mreB</i>                     | cell wall structural complex MreBCD, actin-like component MreB                            | Δ <i>mreB</i> ::kan                             |
| <b>CAG67107 β-P153L Δ<i>mreB</i>. Parental strain: CAG68095</b> |       |                              |                                 |                                                                                           |                                                 |
| 1,484,419                                                       | Δ9 bp | pseudogene (544-552/1001 nt) | <i>gapC</i> ←                   | pseudogene, GAP dehydrogenase; glyceraldehyde-3-phosphate dehydrogenase (second fragment) | parental SNP                                    |
| 3,430,056                                                       | G→A   | E60E (GAG→GAA)               | <i>trkA</i> →                   | NAD-binding component of TrK potassium transporter                                        | SNP in BW2592 genetically linked to <i>mreB</i> |

|                 |      |                         |                                 |                                                                |                                                 |
|-----------------|------|-------------------------|---------------------------------|----------------------------------------------------------------|-------------------------------------------------|
| 3,467,784       | T→C  | K43R (AAA→AGA)          | <i>rpsL</i> ←                   | 30S ribosomal subunit protein S12                              | SNP in BW2592 genetically linked to <i>mreB</i> |
| 4,029,087       | A→T  | noncoding (197/1542 nt) | <i>rrsA</i> →                   | 16S ribosomal RNA of <i>rrnA</i> operon                        | parental SNP                                    |
| 4,171,630       | C→T  | P153L (CCG→CTG)         | <i>rpoB</i> →                   | RNA polymerase, beta subunit                                   | parental SNP                                    |
| 4,175,201       | +T   | coding (4029/4029 nt)   | <i>rpoB</i> →                   | RNA polymerase, beta subunit                                   | parental SNP                                    |
| 4,175,845       | +A   | coding (609/639 nt)     | <i>cat</i> →                    |                                                                | parental SNP                                    |
| 4,175,857       | +T   | coding (621/639 nt)     | <i>cat</i> →                    |                                                                | parental SNP                                    |
| 4,175,978       | +A   | intergenic (+103/-20)   | <i>cat</i> → /<br>→ <i>rpoC</i> | -/RNA polymerase, beta prime subunit                           | parental SNP                                    |
| 3393993-3394395 | Δ403 | missing coverage        | <i>mreB</i>                     | cell wall structural complex MreBCD, actin-like component MreB | Δ <i>mreB</i> ::kan                             |

**Position:** Genomic position of the detected mutation. **Mutation:** Identity of the detected mutation. **Annotation:** Class of mutation detected (amino acid change, coding, intergenic, or missing coverage). **Gene:** Gene affected by the mutation (or those nearby if intergenic). **Description:** Description of the affected gene. **Notes:** Annotation for the source of the detected SNP (parental SNP, derived from the BW2592 donor strain, or a true mutation).

**Supplemental Table 5: Differential gene expression in  $\beta$ -P153L for genes of interest, Related to Figure 7.**

| Gene name               | Accession | $\log_2(\text{fold change in } \beta\text{-P153L})$ | $p\text{-value (adjusted)}$ |
|-------------------------|-----------|-----------------------------------------------------|-----------------------------|
| <b>UDP-glucose/OpgH</b> |           |                                                     |                             |
| <i>pgm</i>              | b0688     | 0.179                                               | $7 \times 10^{-1}$          |
| <i>rfbA</i>             | b2039     | -0.056                                              | $9 \times 10^{-1}$          |
| <i>glgC</i>             | b3430     | 0.180                                               | $7 \times 10^{-1}$          |
| <i>galU</i>             | b1236     | 0.120                                               | $8 \times 10^{-1}$          |
| <i>galE</i>             | b0759     | 0.062                                               | $9 \times 10^{-1}$          |
| <i>galT</i>             | b0758     | 0.133                                               | $6 \times 10^{-1}$          |
| <i>otsA</i>             | b1896     | -0.024                                              | $1 \times 10^0$             |
| <i>ugd</i>              | b2028     | -0.184                                              | $7 \times 10^{-1}$          |
| <i>opgG</i>             | b1048     | -0.121                                              | $8 \times 10^{-1}$          |
| <b>Divisome</b>         |           |                                                     |                             |
| <i>ftsI</i>             | b0084     | 0.197                                               | $6 \times 10^{-1}$          |
| <i>murE</i>             | b0085     | 0.100                                               | $8 \times 10^{-1}$          |
| <i>murF</i>             | b0086     | 0.243                                               | $3 \times 10^{-1}$          |
| <i>mraY</i>             | b0087     | 0.476                                               | $1 \times 10^{-1}$          |
| <i>murD</i>             | b0088     | 0.070                                               | $9 \times 10^{-1}$          |
| <i>ftsW</i>             | b0089     | 0.296                                               | $2 \times 10^{-1}$          |
| <i>murG</i>             | b0090     | 0.167                                               | $6 \times 10^{-1}$          |
| <i>murC</i>             | b0091     | 0.690                                               | $3 \times 10^{-4}$          |
| <i>ftsQ</i>             | b0093     | -0.036                                              | $9 \times 10^{-1}$          |
| <i>ftsA</i>             | b0094     | 0.433                                               | $1 \times 10^{-2}$          |
| <i>ftsZ</i>             | b0095     | 0.751                                               | $3 \times 10^{-4}$          |
| <i>mrcB</i>             | b0149     | -0.301                                              | $2 \times 10^{-1}$          |
| <i>dacA</i>             | b0632     | 0.120                                               | $8 \times 10^{-1}$          |
| <i>ftsK</i>             | b0890     | 0.068                                               | $9 \times 10^{-1}$          |
| <i>lpoB</i>             | b1105     | 0.024                                               | $1 \times 10^0$             |
| <i>zipA</i>             | b2412     | 0.262                                               | $3 \times 10^{-1}$          |
| <i>amiA</i>             | b2435     | -0.045                                              | $9 \times 10^{-1}$          |
| <i>ftsB</i>             | b2748     | -0.620                                              | $2 \times 10^{-1}$          |
| <i>amiC</i>             | b2817     | -0.019                                              | $1 \times 10^0$             |
| <i>zapA</i>             | b2910     | 0.167                                               | $8 \times 10^{-1}$          |
| <i>ftsX</i>             | b3462     | -0.415                                              | $2 \times 10^{-1}$          |
| <i>ftsE</i>             | b3463     | 0.091                                               | $9 \times 10^{-1}$          |
| <i>zapB</i>             | b3928     | -1.698                                              | $2 \times 10^{-5}$          |
| <i>ftsN</i>             | b3933     | -0.216                                              | $4 \times 10^{-1}$          |
| <i>murB</i>             | b3972     | -0.392                                              | $1 \times 10^{-1}$          |
| <i>amiB</i>             | b4169     | -0.005                                              | $1 \times 10^0$             |

**Gene name:** Gene in question. **Accession:** Unique identifier for gene in question.  **$\log_2(\text{fold change in } \beta\text{-P153L})$ :**  $\log_2$ -transformed fold-change values of read counts for  $\beta$ -P153L normalized to the parental control, as calculated by DESeq2 (Love et al., 2014).  **$p\text{-value (adjusted)}$ :** Multiple hypothesis-corrected  $p$ -value for the fold change, as calculated by DESeq2 (Love et al., 2014).
